# Supplementary material
Source: publisher figshare collection journal article supplement (https://acs.figshare.com/ndownloader/files/10104258)
Supplement: Supplementary file 1 [file 10104258]

# Surface Self-Assembly of Functional Electroactive Nanofibers on Textile Yarns as a Facile Approach Towards Super Flexible Energy Storage

*Mike Tebyetekerwa<sup>a†</sup>, Zhen Xu<sup>a§†</sup>, Weili Li<sup>b</sup>, Xingping Wang<sup>a</sup>, Ifra Marriam<sup>c</sup>, Shengjie  
Peng<sup>d,e</sup>, Seeram Ramkrishna<sup>e</sup>, Shengyuan Yang<sup>a\*</sup> and Meifang Zhu<sup>a\*</sup>*

<sup>a</sup>State Key Laboratory for Modification of Chemical Fibers and Polymer Materials, College of  
Materials Science and Engineering, Donghua University, Shanghai 201620, China

<sup>b</sup>School of Materials Science and Engineering, National Demonstration Center for Experimental  
Materials Science and Engineering, Jiangsu University of Science and Technology, Zhenjiang  
212003

<sup>c</sup>Key Laboratory of Textile Science & Technology, Ministry of Education, College of Textiles,  
Donghua University, Shanghai 201620, PR China

<sup>d</sup>College of Materials Science and Engineering, Nanjing University of Aeronautics and  
Astronautics, Nanjing 210016, China

<sup>e</sup>Centre for Nanofibers and Nanotechnology, National University of Singapore, Singapore  
117581, Singapore

† Authors Contributed Equally Towards this Work

§ Present Affiliation, School of Engineering and Materials Science, Queen Mary University of  
London, Mile End Road, London E1 4NS, United Kingdom

**Corresponding Author(s)** \* S.Y (cmseysy@dhu.edu.cn) and M.Z (zhumf@dhu.edu.cn)

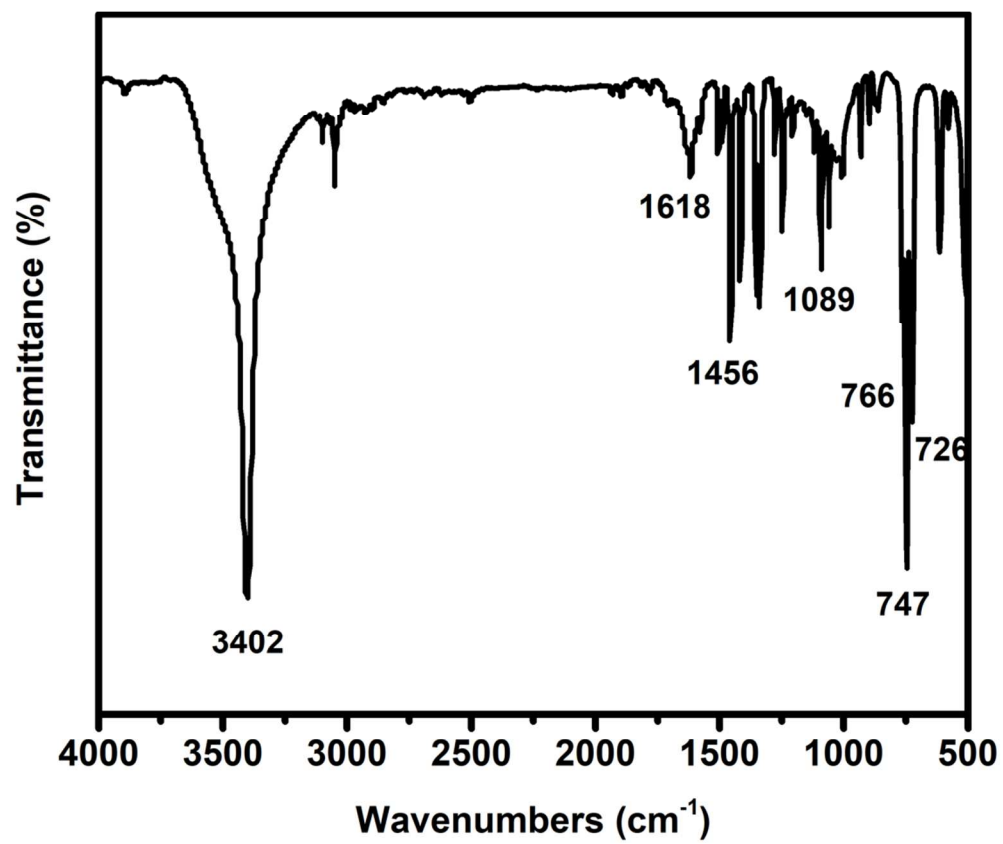

Figure S1. FTIR curve of indole monomer

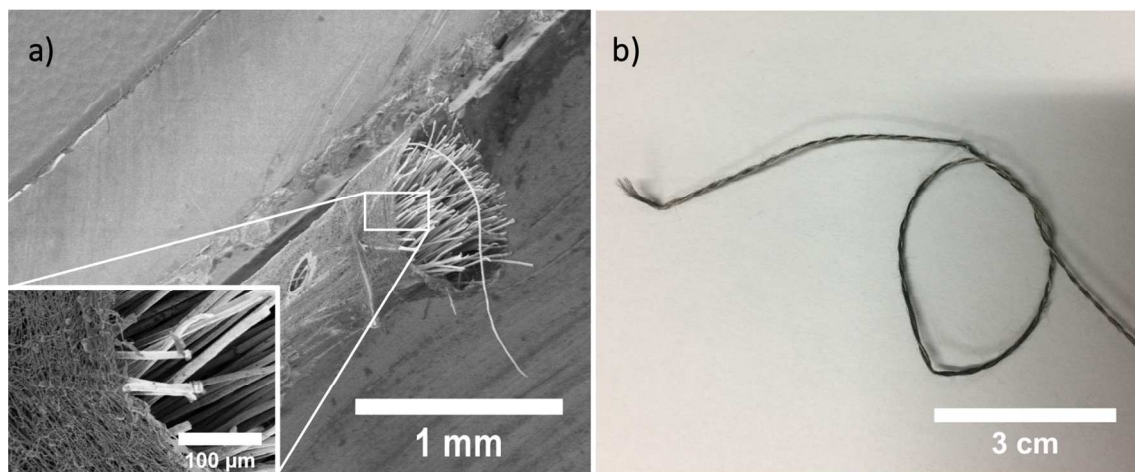

**Figure S2.** a) SEM image of Pind/CB 1-4 after 3 min of electrospinning and b) pictorial image of the flexible SSY employed

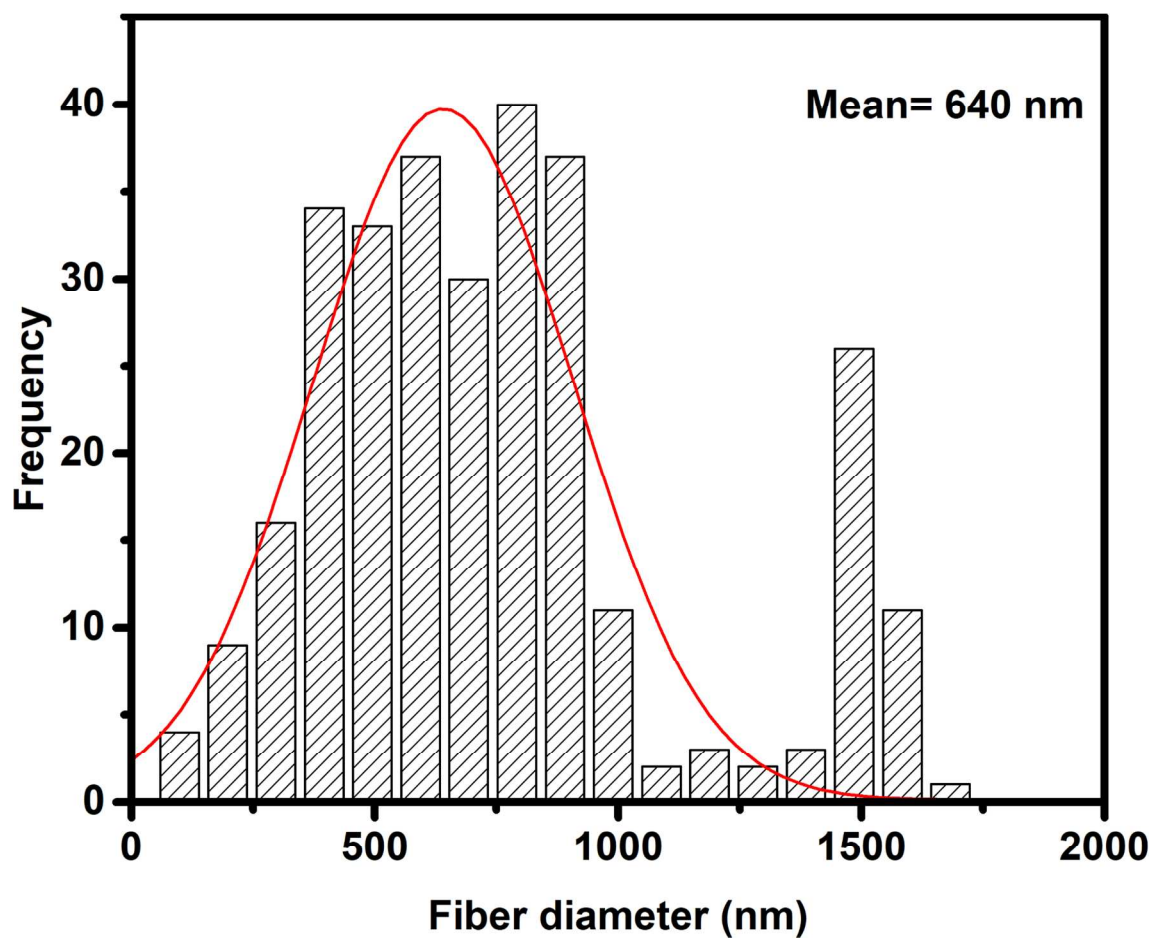

**Figure S3.** Diameter distribution of the Pind/CB 1-4 nanofibers spun on NCY with the mean diameter of 640 nm

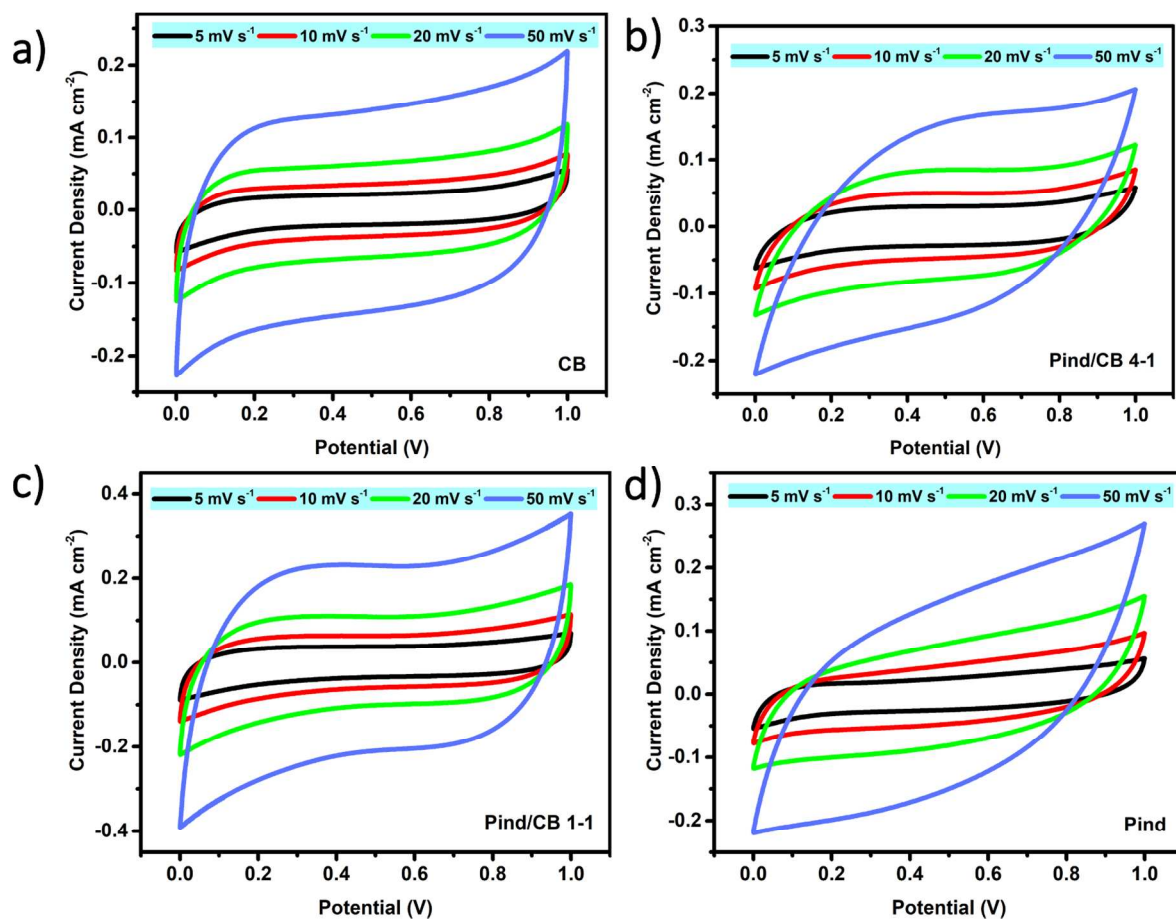

**Figure S4.** CV curves of CB (a), Pind/CB 4-1(b), Pind/CB 1-1(c), and Pind NCY (d)

supercapacitors

**Table S1.** Comparison of the currently reported NCY supercapacitor with other high-performance supercapacitors in the literature

| <b>Metal@Active Material Fiber Devices</b> | <b>Device Capacitance</b>       | <b>Reference</b> |
|--------------------------------------------|---------------------------------|------------------|
| rGO-Ni-PET yarn                            | 72.1 mF cm <sup>-2</sup>        | Ref 15           |
| Pt@CNT/Pani                                | 52.5 mF cm <sup>-2</sup>        | Ref 5            |
| SSY@ rGO/MnO <sub>2</sub> /Ppy             | 205.5 mF cm <sup>-2</sup>       | Ref 50           |
| ZnO@ PMMA on Au@Kevlar fiber               | 2.4 mF cm <sup>-2</sup>         | Ref 7            |
| Stainless steel wire @AC                   | 3.18 mF cm <sup>-2</sup>        | Ref 9            |
| Ti@MnO <sub>2</sub>                        | 15.6 mF cm <sup>-2</sup>        | Ref 48           |
| Ni@graphite Carbon (Pen Ink)               | 19.5 mF cm <sup>-2</sup>        | Ref 11           |
| <b>SSY@Pind/CB NCY</b>                     | <b>28.16 mF cm<sup>-2</sup></b> | <b>This work</b> |
